# Supplementary material for: Non-Invasive Radiofrequency Field Treatment of 4T1 Breast Tumors Induces T-cell Dependent Inflammatory Response
Source: Sci Rep. 2018 Feb 22;8:3474. doi: 10.1038/s41598-018-21719-w (PMC5823899; doi:10.1038/s41598-018-21719-w)
Supplement: Supplementary file 1 — Supporting Information [file 41598_2018_21719_MOESM1_ESM.pdf]

# Non-Invasive Radiofrequency Field Treatment of 4T1 Breast Tumors Induce T-cell Dependent Inflammatory Response

Jared M. Newton, Jose Flores-Arredondo, Sarah Suki, Matthew J. Ware, Martyna Krzykawska-Serda, Mahdi Agha, Justin J. Law, Andrew G. Sikora, Steven A. Curley, and Stuart J. Corr

## Supplementary Information

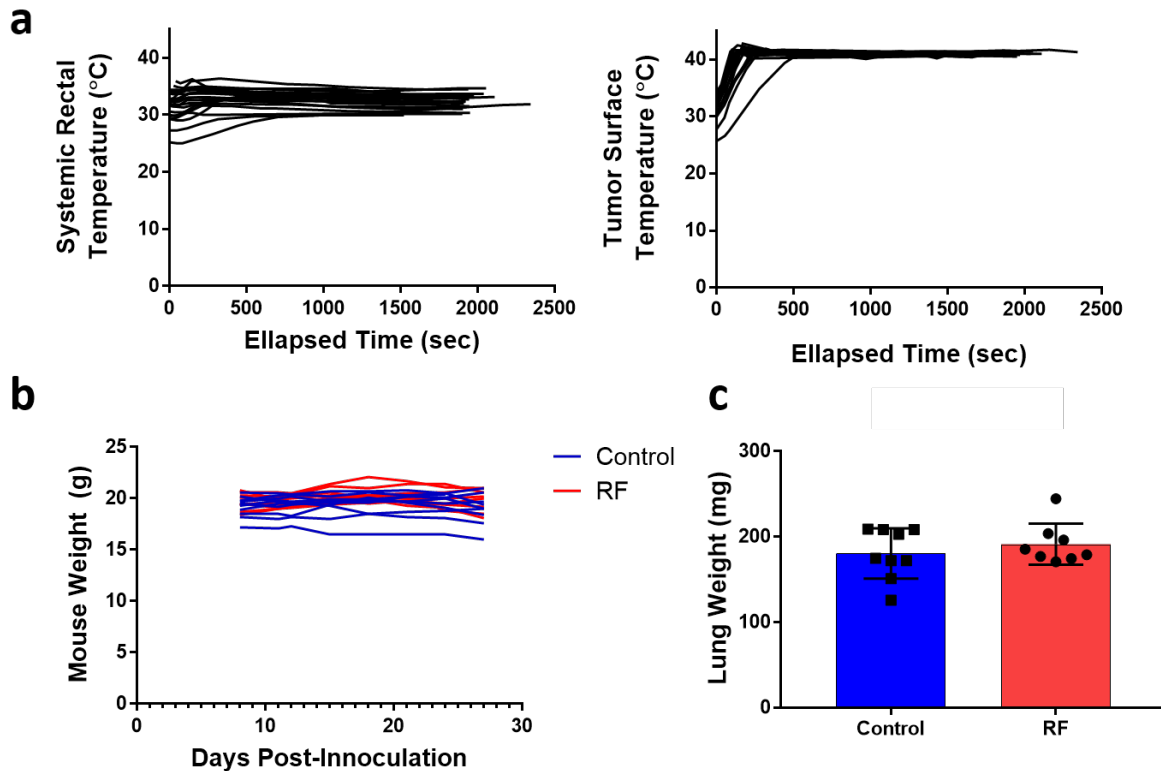

**Figure S1: RFT promotes consistent and safe intratumoral hyperthermia.** a) Representative systemic temperature measurements from rectally inserted fiber-optic probe (left) and tumor surface temperature measurement from IR camera for RFT mice bearing 4T1 tumors showing changes during an entire treatment duration (n=10 mice, 2 different treatment days). b) Mouse weight changes in grams following multiple treatments between RFT and control-treated mice (n=10/group; for schedule see Figure 2A). c) Mouse lung weights (mg) after multiple treatments between RFT and control-treated mice (n=10/group; each dot represents an individual mouse lung weight).

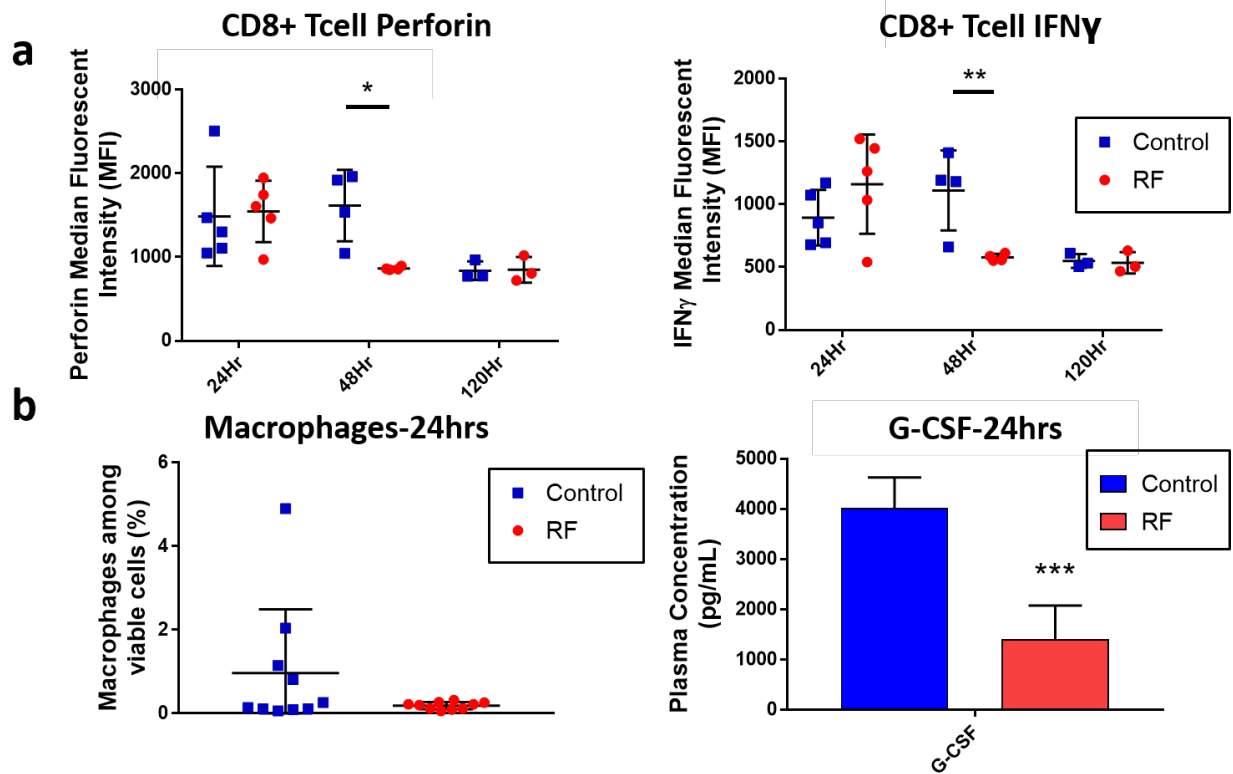

**Figure S2: RFT induced changes in T-cell activation and macrophages.** a) Cumulative dot plots showing perforin (left) and IFN $\gamma$  (right) median fluorescent intensity among tumor dwelling CD8+ T-cell at 24, 48, and 120 hours post-treatment (n=5/group). b) Tumor macrophage percentages among total viable cells at 24, 48, and 120 hours post-treatment (left; n=5/group). Plasma concentration in pg/mL of G-CSF comparing control and RF-treated mice 24hrs post-RFT (right; n=5/group)

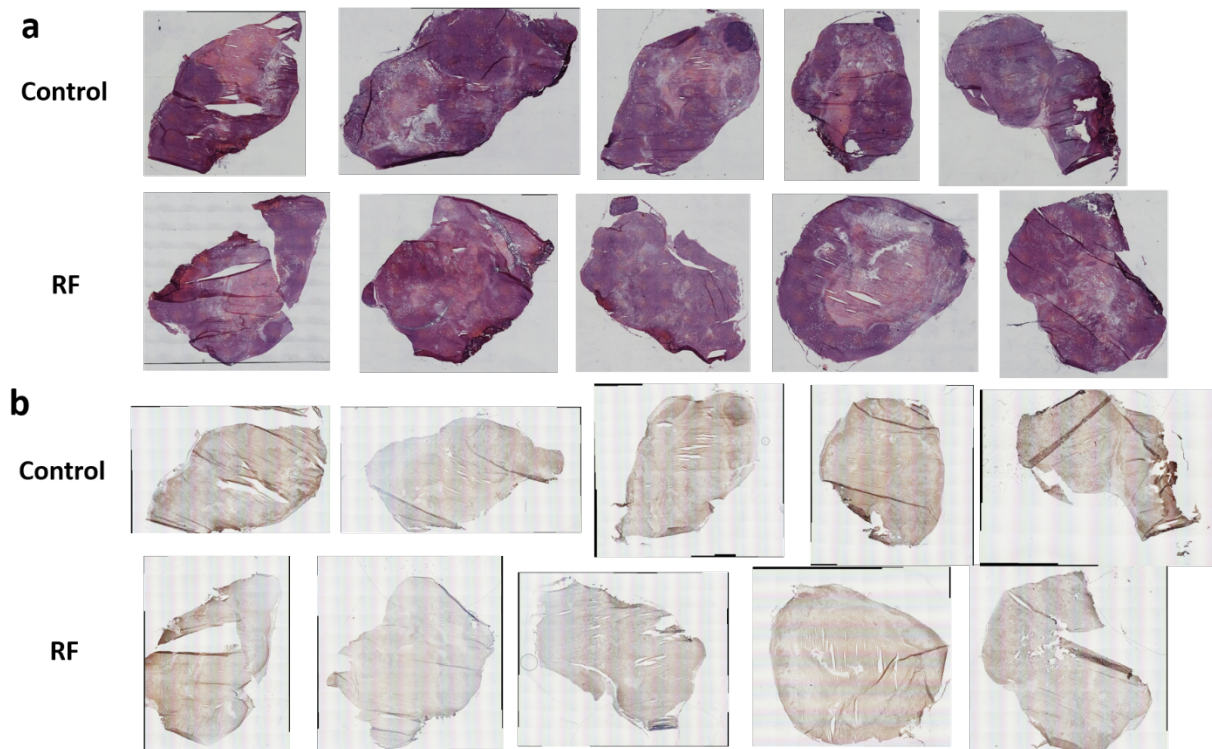

**Figure S3: H&E and Ki67 histology of control and RFT tumors.** Full image set showing **a)** H&E staining and **b)** Ki67 immunohistochemical staining following multiple treatments, either RFT or control (see Figure 2a for treatment schedule).

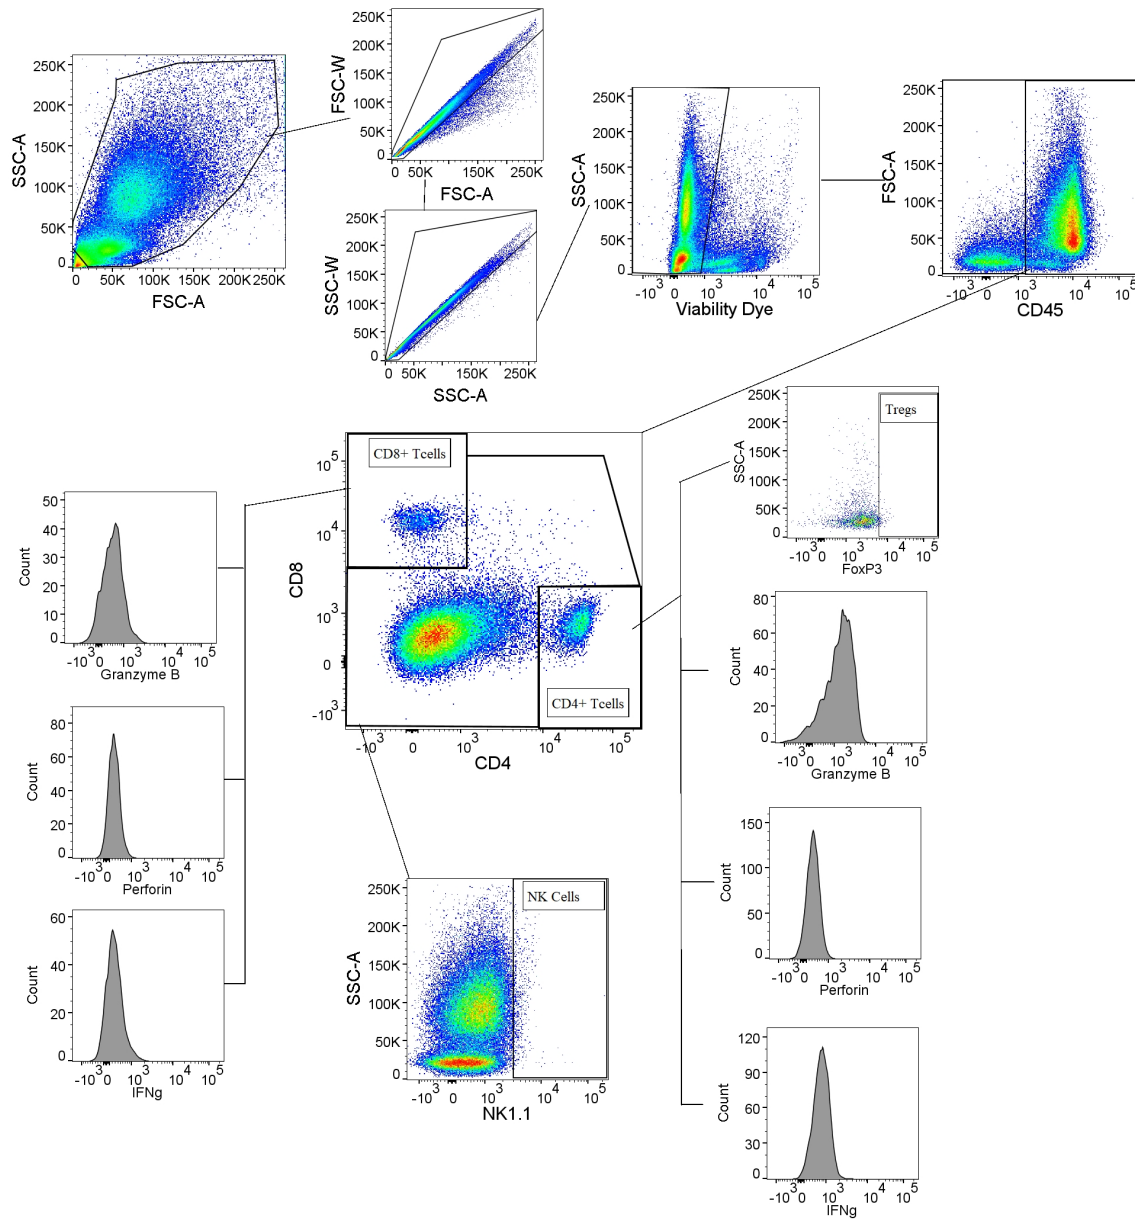

**Figure S4: Immune microenvironment lymphocyte-focused flow cytometry gating panel.** Representative flow cytometry plots and histograms showing gating strategy used for quantification of lymphocyte cell types and features in the immune microenvironment study. All cell types were represented as a percentage of total viable cells analyzed.

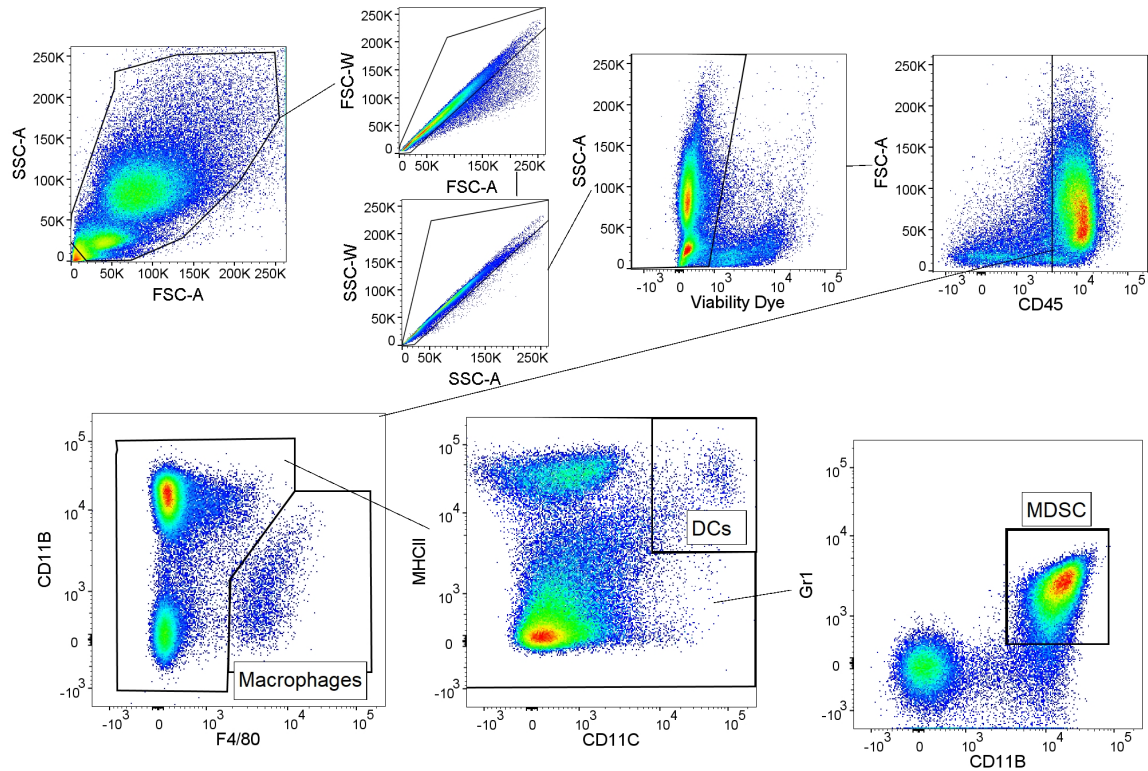

**Figure S5: Immune microenvironment myeloid-focused flow cytometry gating panel.** Representative flow cytometry plots showing gating strategy used for quantification of myeloid cell types in the immune microenvironment study. All cell types were represented as a percentage of total viable cells analyzed.

**Supplementary Table 1: Changes in primary immune cell subsets in the tumor, all as a percent of total viable cells. Data presented as average (SEM).**

|                                                            | Tumor-24hrs   |               | Tumor-48hrs   |               | Tumor-120hrs   |                |
|------------------------------------------------------------|---------------|---------------|---------------|---------------|----------------|----------------|
|                                                            | Control %     | RF %          | Control %     | RF %          | Control %      | RF %           |
| CD4+ Tcells (CD45+/CD4+)                                   | 0.677 (0.152) | 2.141 (0.246) | 1.042 (0.586) | 0.420 (0.136) | 0.954 (0.339)  | 0.435 (0.222)  |
| CD8+ Tcells (CD45+/CD8+)                                   | 0.169 (0.054) | 0.709 (0.134) | 0.248 (0.147) | 0.057 (0.033) | 0.204 (0.107)  | 0.098 (0.052)  |
| Treg (CD45+/CD4+/FoxP3+)                                   | 0.129 (0.040) | 0.230 (0.085) | 0.646 (0.471) | 0.215 (0.085) | 0.5782 (0.220) | 0.2742 (0.163) |
| NK Cell (CD45+/NK1.1+)                                     | 0.005 (0.001) | 0.005 (0.001) | 0.004 (0.002) | 0.002 (0.001) | 0.002 (0.001)  | 0.001 (0.001)  |
| Macrophage (CD45+, F4/80+, CD11b <sup>intermediate</sup> ) | 0.968 (0.482) | 0.189 (0.027) | 3.032 (1.356) | 2.206 (1.022) | 4.384 (0.449)  | 4.742 (0.555)  |
| DC (CD45+, F4/80-, CD11c+, MHCII <sup>high</sup> )         | 1.874 (0.193) | 1.394 (0.235) | 1.892 (0.127) | 1.394 (0.198) | 1.936 (0.510)  | 2.652 (0.423)  |
| MDSC (CD45+, F4/80-, CD11c-, CD11b+, Gr1+)                 | 0.512 (0.193) | 0.666 (0.215) | 1.366 (0.209) | 1.312 (0.110) | 0.996 (0.225)  | 1.288 (0.117)  |

**Supplementary Table 2: Changes in primary immune cell subsets in the spleen, all as a percent of total viable cells. Data presented as average (SEM).**

|                                                            | Spleen-24hrs   |                | Spleen-48hrs  |               | Spleen-120hrs  |                |
|------------------------------------------------------------|----------------|----------------|---------------|---------------|----------------|----------------|
|                                                            | Control %      | RF %           | Control %     | RF %          | Control %      | RF %           |
| CD4+ Tcell (CD45+/CD4+)                                    | 4.620 (0.907)  | 5.703 (1.583)  | 4.238 (1.406) | 4.344 (0.289) | 4.380 (0.780)  | 5.158 (0.766)  |
| CD8+ Tcells (CD45+/CD8+)                                   | 1.869 (0.500)  | 2.107 (0.683)  | 1.840 (0.596) | 1.448 (0.145) | 2.206 (0.410)  | 2.416 (0.377)  |
| Treg (CD45+/CD4+/FoxP3+)                                   | 0.148 (0.051)  | 0.220 (0.080)  | 0.095 (0.037) | 0.210 (0.022) | 0.159 (0.036)  | 0.244 (0.071)  |
| NK Cell (CD45+/NK1.1+)                                     | 0.280 (0.091)  | 0.251 (0.084)  | 0.700 (0.128) | 0.856 (0.079) | 0.438 (0.062)  | 0.538 (0.082)  |
| Macrophage (CD45+, F4/80+, CD11b <sup>intermediate</sup> ) | 2.536 (0.698)  | 2.838 (0.691)  | 3.898 (0.495) | 4.422 (0.439) | 2.996 (0.418)  | 2.896 (0.276)  |
| DC (CD45+, F4/80-, CD11c+, MHCII <sup>High</sup> )         | 1.304 (0.106)  | 1.312 (0.068)  | 1.260 (0.200) | 1.44 (0.079)  | 0.860 (0.241)  | 1.050 (0.094)  |
| MDSC (CD45+, F4/80-, CD11c-, CD11b+, Gr1+)                 | 20.014 (6.775) | 16.584 (6.030) | 46.54 (4.766) | 43.12 (2.541) | 35.980 (9.932) | 43.200 (3.455) |

**Supplementary Table 3: Changes in primary immune cell subsets in the tumor draining inguinal lymph node, all as a percent of total viable cells. Data presented as average (SEM).**

|                                                            | tdLN-24hrs     |               | tdLN-48hrs    |                | tdLN-120hrs    |                |
|------------------------------------------------------------|----------------|---------------|---------------|----------------|----------------|----------------|
|                                                            | Control %      | RF %          | Control %     | RF %           | Control %      | RF %           |
| CD4+ Tcell (CD45+/CD4+)                                    | 17.067 (7.287) | 1.149 (0.824) | 4.68 (4.374)  | 21.398 (6.516) | 24.767 (1.073) | 44.000 (5.059) |
| CD8+ Tcells (CD45+/CD8+)                                   | 8.115 (3.428)  | 0.462 (0.390) | 2.545 (2.415) | 7.937 (2.223)  | 10.32 (0.841)  | 16.767 (0.809) |
| Treg (CD45+/CD4+/FoxP3+)                                   | 2.707 (1.510)  | 0.123 (0.085) | 0.638 (0.584) | 1.220 (0.380)  | 3.033 (0.462)  | 2.660 (0.535)  |
| NK Cell (CD45+/NK1.1+)                                     | 0.085 (0.021)  | 0.299 (0.127) | 0.258 (0.084) | 0.058 (0.013)  | 0.068 (0.042)  | 0.057 (0.021)  |
| Macrophage (CD45+, F4/80+, CD11b <sup>intermediate</sup> ) | 0.080 (0.034)  | 0.588 (0.321) | 0.059 (0.025) | 0.043 (0.008)  | 0.033 (0.009)  | 0.019 (0.006)  |
| DC (CD45+, F4/80-, CD11c+, MHCII <sup>High</sup> )         | 0.601 (0.264)  | 0.394 (0.197) | 0.191 (0.140) | 0.288 (0.046)  | 0.270 (0.099)  | 0.323 (0.131)  |
| MDSC (CD45+, F4/80-, CD11c-, CD11b+, Gr1+)                 | 0.126 (0.027)  | 0.492 (0.154) | 0.578 (0.207) | 0.064 (0.003)  | 0.189 (0.076)  | 0.160 (0.036)  |

**Supplementary Table 4: Changes in primary immune cell subsets in the blood, all as a percent of total viable cells. Data presented as average (SEM).**

|                                                            | Blood-24hrs   |               | Blood-48hrs    |               | Blood-120hrs   |               |
|------------------------------------------------------------|---------------|---------------|----------------|---------------|----------------|---------------|
|                                                            | Control %     | RF %          | Control %      | RF %          | Control %      | RF %          |
| CD4+ Tcell (CD45+/CD4+)                                    | 1.454 (0.498) | 0.752 (0.139) | 0.682 (0.159)  | 0.988 (0.106) | 1.168 (0.186)  | 1.012 (0.115) |
| CD8+ Tcells (CD45+/CD8+)                                   | 0.502 (0.175) | 0.250 (0.050) | 0.206 (0.048)  | 0.300 (0.029) | 0.416 (0.061)  | 0.376 (0.039) |
| Treg (CD45+/CD4+/FoxP3+)                                   | 0.304 (0.079) | 0.286 (0.199) | 0.290 (0.164)  | 0.180 (0.097) | 0.854 (0.190)  | 0.560 (0.159) |
| NK Cell (CD45+/NK1.1+)                                     | 0.026 (0.017) | 0.007 (0.002) | 0.005 (0.002)  | 0.006 (0.001) | 0.023 (0.007)  | 0.075 (0.033) |
| Macrophage (CD45+, F4/80+, CD11b <sup>intermediate</sup> ) | 0.538 (0.216) | 0.193 (0.062) | 0.242 (0.056)  | 0.226 (0.028) | 1.900 (1.413)  | 0.632 (0.340) |
| DC (CD45+, F4/80-, CD11c+, MHCII <sup>High</sup> )         | 0.017 (0.005) | 0.009 (0.001) | 0.015 (0.003)  | 0.014 (0.002) | 0.012 (0.004)  | 0.016 (0.003) |
| MDSC (CD45+, F4/80-, CD11c-, CD11b+, Gr1+)                 | 15.26 (6.839) | 6.55 (0.870)  | 11.230 (1.828) | 7.808 (1.089) | 10.580 (3.256) | 7.216 (1.962) |
